1        **Human reference gut microbiome comprising 5,414 prokaryotic species, including**  
2        **newly assembled genomes from under-represented Asian metagenomes**

3

4    Chan Yeong Kim<sup>1†</sup>, Muyoung Lee<sup>1†</sup>, Sunmo Yang<sup>1</sup>, Kyungnam Kim<sup>2</sup>, Dongeun Yong<sup>2</sup>, Hye  
5    Ryun Kim<sup>3</sup>, and Insuk Lee<sup>1\*</sup>

6    <sup>1</sup> Department of Biotechnology, College of Life Science & Biotechnology, Yonsei University,  
7    Seoul 03722, Korea

8    <sup>2</sup> Department of Laboratory Medicine, Research Institute of Bacterial Resistance, College of  
9    Medicine, Yonsei University, Seoul 03722, Korea

10   <sup>3</sup> Division of Medical Oncology, Department of Internal Medicine, Yonsei Cancer Center,  
11   College of Medicine, Yonsei University, Seoul 03722, Korea

12   <sup>†</sup> These authors contributed equally to this work

13   \* Corresponding author:

14   Insuk Lee

15   Tel: +82-10-4186-8706, E-mail: [insuklee@yonsei.ac.kr](mailto:insuklee@yonsei.ac.kr)

16

17   Short title: Human reference gut microbiome

18   Key words: metagenomic shotgun sequencing, human gut microbiome, metagenome-  
19   assembled genome

20

21 **Abstract**

22 Metagenome sampling bias for geographical location and lifestyle is partially responsible for  
23 the incomplete catalog of reference genomes of gut microbial species. Here, we present a  
24 substantially expanded microbiome catalog, the Human Reference Gut Microbiome (HRGM).  
25 Incorporating newly assembled 29,082 genomes from 845 fecal samples collected from three  
26 under-represented Asian countries—Korea, India, and Japan—the HRGM contains 232,098  
27 non-redundant genomes of 5,414 representative prokaryotic species, >103 million unique  
28 proteins, and >274 million single-nucleotide variants. This is an over 10% increase from the  
29 largest reference database. The newly assembled genomes were enriched for members of the  
30 *Bacteroidaceae* family, including species associated with high-fiber and seaweed-rich diet.  
31 Single-nucleotide variant density was positively associated with the speciation rate of gut  
32 commensals. Ultra-deep sequencing facilitated the assembly of genomes of low-abundance  
33 taxa, and deep sequencing (>20 million read pairs) was needed for the profiling of low-  
34 abundance taxa. Importantly, the HRGM greatly improved the taxonomic and functional  
35 classification of sequencing reads from fecal samples. Finally, mapping homologous  
36 sequences for human auto-antigens onto the HRGM genomes revealed the association of  
37 commensal bacteria with high cross-reactivity potential with autoimmunity. The HRGM  
38 ([www.mbiomenet.org/HRGM/](http://www.mbiomenet.org/HRGM/)) will facilitate the identification and functional analysis of  
39 disease-associated gut microbiota.

40

## 41 **Introduction**

42 Human gut microbiome is considered the “second human genome” and plays a crucial role in  
43 various diseases<sup>1,2</sup>. Therefore, targeting gut microbes and their functional elements may  
44 provide novel therapeutic opportunities. The assembly of human reference genome, together  
45 with a catalog of protein-coding genes and genomic variants, led us to the era of genomic  
46 medicine. Likewise, transformation of human medicine by harnessing the gut microbes  
47 requires the cataloging of reference microbial genomes and their encoded functional elements.  
48 Conventional approaches for microbial genome assembly require microbial isolation and  
49 culture. Indeed, with the development of culturomics technology, the number of culturable  
50 gut microbes has increased greatly<sup>3-6</sup>. However, the culturable taxa are biased toward specific  
51 clades, and a large portion of the human gut microbiome remains unculturable<sup>7-9</sup>. To address  
52 this, culture-independent methods of metagenome assembly from whole-metagenomic  
53 shotgun sequencing (WMS) data have been developed.

54 Recently, three independent studies have consecutively released large collections of  
55 prokaryotic genomes, including many based on metagenome assembly<sup>8-10</sup>. The metagenome-  
56 assembled genomes (MAGs) from these studies were then combined with the genomic  
57 information deposited in public databases to generate integrated catalogs of prokaryotic  
58 genomes and proteins in the human gut<sup>11</sup>, the Unified Human Gastrointestinal Genome  
59 (UHGG) and Unified Human Gastrointestinal Protein (UHGP) catalogs, respectively. The  
60 UHGG contains 204,938 non-redundant genomes that represent 4,644 prokaryotic species  
61 and the UHGP catalogs approximately 95 million unique proteins.

62 Despite the latest advances, the current human gut microbiome catalog is incomplete,  
63 partially because the metagenome sampling is biased for geographical location and lifestyle.  
64 Specifically, the UHGG is strongly biased towards fecal samples collected in China,  
65 Denmark, Spain, and the US. In the present study, to account for the under-sampling of  
66 certain metagenomes, we assembled genomes from fecal samples collected from Korea, India,  
67 and Japan. Since the genome assembly of low-abundance species in most human fecal  
68 samples may require a much deeper sequencing than usually employed, we performed ultra-  
69 deep WMS (>30 Gbp or >100 million read pairs) of 90 fecal samples collected from Korea.  
70 We then collected public WMS data for 110 fecal samples from India and 805 fecal samples  
71 from Japan. We consequently assembled 29,082 prokaryotic genomes, and combined them

72 with the UHGG genomes to generate the Human Reference Gut Microbiome (HRGM),  
73 which substantially expands the list of representative species, genomes, proteins, and single-  
74 nucleotide variants (SNVs) in the human gut microbiome. The HRGM is a freely available  
75 resource and will be invaluable to therapeutic targeting of the gut microbiota.

76

## 77 **Results**

### 78 **Assembly of gut microbial genomes from Korea, India, and Japan**

79 We assembled prokaryotic genomes using an in-house bioinformatics pipeline  
80 (**Supplementary Fig. 1a, Methods**), which is more exhaustive than similar approaches<sup>8-11</sup>  
81 (**Supplementary Table 1**). For instance, we adopted an ensemble method for binning  
82 assembled contigs, as it showed better performance than individual binning tools<sup>12,13</sup>. We  
83 hypothesized that metagenomes harbored by individuals from under-represented geographical  
84 locations and lifestyles would expand the current catalog of human gut microbiome.  
85 Therefore, we performed *de novo* genome assembly of fecal samples from three Asian  
86 countries: Korea, India, and Japan (referred to here as KIJ samples, **Supplementary Table 2**).  
87 At the start of the current study, WMS data for 805 and 110 fecal samples from Japan and  
88 India, respectively, were publicly available but not included in the UHGG<sup>14,15</sup>. To  
89 complement these data, we generated WMS data for fecal samples collected from 90 donors  
90 recruited in Korea. We set the minimum completeness at 50% and the maximum  
91 contamination at 5% for genomes of minimum quality. We divided the genome bins into two  
92 groups: high quality (HQ) genomes with  $\geq 90\%$  completeness and  $\leq 5\%$  contamination, and  
93 medium quality (MQ) genomes (the remaining genomes). This yielded 29,082 KIJ sample  
94 MAGs: 7,767 from Korea, 563 from India, and 20,752 from Japan.

95

### 96 **Ultra-deep sequencing facilitates the genomic assembly of low-abundance taxa**

97 To investigate the impact of metagenome sequencing depth on *de novo* genome assembly, we  
98 performed ultra-deep sequencing of the 90 Korean fecal samples ( $>30$  Gbp or  $>100$  million  
99 read pairs); the depth was approximately 5-fold deeper than the normal sequencing depth  
100 (**Fig. 1a**). Despite sequencing at the normal depth, fecal samples from Japan had a larger total

101 read length than Korean samples because of a much larger sample size (**Fig. 1b**). For nine of  
102 the 90 Korean samples, approximately 60 Gbp was sequenced for the study of sequencing  
103 depth effect on genome assembly. We then generated 81 simulated WMS datasets (9 different  
104 depths for each of the 9 original samples with ~60 Gbp depth) and used the same pipeline of  
105 *de novo* genome assembly for all samples. As expected, the number of HQ and MQ genomes  
106 increased with the increasing sequencing depth. However, the growth rate simultaneously  
107 decreased and the proportion of HQ genomes became stable after the initial phase of rapid  
108 growth (**Fig. 1c**). Next, we investigated whether the increased sequencing depth improved the  
109 quality of assembled genomes. We compared the assembly quality of MAGs for the same  
110 species in two different simulated samples at adjacent sequencing depths (**Supplementary**  
111 **Fig. 2; Methods**). The quality of MAGs from the greater sequencing depth was significantly  
112 higher than that of genomes from the lower sequencing depth in terms of completeness,  
113 contamination, N50, and genome size (**Fig. 1d,e; Supplementary Fig. 3a,b**). However, the  
114 degree of improvement of the assembly quality diminished as the sequencing depth increased.

115 We then examined the effect of sequencing depth using the actual WMS data for KIJ samples.  
116 The number of HQ and MQ genomes assembled from each sample was highest in the ultra-  
117 deep sequenced samples from Korea (**Fig. 1f**). However, the proportion of HQ genomes in  
118 samples from Korea and Japan was not significantly different (**Fig. 1g; Supplementary Fig.**  
119 **3c**). Notably, the genome assembly yield, i.e., the number of assembled genomes divided by  
120 the total sequencing length, was highest for samples from Japan (**Fig. 1g**). This suggests that  
121 sequencing hundreds of samples at a depth of 5–10 Gbp may constitute the most effective  
122 strategy for cataloging MAGs for a given population.

123 The ultra-deep sequencing may be advantageous for the genome assembly for low-abundance  
124 taxa. To test this, we compared MAGs exclusively assembled from each country but not  
125 included in the UHGG, i.e., 224, 388, and 18 genomes from Korea, Japan, and India,  
126 respectively. We then estimated their relative abundance in fecal samples in an independent  
127 population of 926 fecal samples from the US<sup>16</sup>, using Kraken2<sup>17</sup>. The genomes assembled  
128 exclusively from Korean samples shifted towards low-abundance taxa compared with  
129 genomes assembled from samples from other countries (**Fig. 1h**), which confirmed the  
130 original hypothesis.

131

## 132 **Cataloging reference genomes of 5,414 prokaryotic species from the human gut**

133 To construct the most comprehensive reference database for the human gut microbiome, we  
134 integrated the newly generated 29,082 MAGs from KIJ samples with the UHGG genomes  
135 using dereplication approach (**Supplementary Fig. 1b, Methods**). Dereplication of the  
136 29,082 MAGs resulted in 2,199 clusters of genomes. We selected a representative genome  
137 from each cluster to catalog the genomes for 2,199 representative species, which we then  
138 integrated with 4,644 representative genomes from the UHGG, via dereplication, resulting in  
139 5,414 clusters of genomes. Finally, we selected 5,414 representative genomes and assigned  
140 their phylogenetic classifications using GTDB-Tk<sup>18</sup> (**Fig. 2**). Among these representative  
141 genomes, 4,531 (83.7%) genomes were exclusively assembled from metagenomic data,  
142 which confirmed the notion that the major portion of the human gut microbiome has not yet  
143 been isolated. We identified 16S rRNA sequences in 2,542 representative genomes (47%)  
144 (**Supplementary Fig. 4**), covering the majority of phylogenetic clades. Unlike conventional  
145 databases of 16S rRNA sequences, the new database provides opportunities for functional  
146 interpretation of the detected taxa because it contains genomes corresponding to the 16S  
147 rRNA sequences.

148 The inclusion of MAGs from KIJ samples in the new database allowed several improvements  
149 on the UHGG. First, we reduced the data bias toward China among Asian countries  
150 (**Supplementary Fig. 5a**). Second, we expanded the total number of non-redundant reference  
151 genomes by 13.25% and the number of representative species by 16.6% increase  
152 (**Supplementary Table 3**). Among the 5,414 representative genomes, 780 genomes were  
153 assembled from KIJ samples only, and 536 representative genomes from the UHGG were  
154 replaced with new MAGs from KIJ samples. Hence, 1,316 representative genomes (28.3%)  
155 were updated in the HRGM (**Supplementary Fig. 5b**).

156

## 157 **New MAGs from Korea, India, and Japan are associated with diet-related lifestyles**

158 Notably, *Bacteroidaceae* family (**Fig. 3**, redtree branches) was enriched in the updated  
159 MAGs ( $P < 0.001$ , Fisher's exact test). Almost half the genomes from this family are from  
160 the *Bacteroides* genus and approximately two-thirds of the other half are from the *Prevotella*  
161 genus (**Supplementary Fig. 6**). Interestingly, three widely dispersed regions in the

162 phylogenetic tree were highly enriched in the updated genome set. The first region (“a”)  
163 encompasses a portion of the *Prevotella* genus and includes 30 genomes annotated as  
164 *Prevotella copri*. Accordingly, westernized populations with a typically high-fat and low-  
165 complex carbohydrate diet exhibit low prevalence and diversity of *P. copri* compared with  
166 non-westernized populations<sup>19</sup>. The second region (“b”) encompasses a portion of the  
167 *Bacteroides* genus and includes 22 genomes annotated as *Bacteroides plebeius*. This species  
168 is typically found in Japanese subjects whose diet includes seaweed-rich food, such as sushi<sup>20</sup>.  
169 It has been suggested that *B. plebeius* harbors genes encoding an enzyme specific for algal  
170 carbohydrates, acquired from marine microbes. The third region (“c”) also encompasses a  
171 portion of the *Bacteroides* genus and includes 12 genomes annotated as *Bacteroides vulgatus*,  
172 which is typically present in the human distal gut, where undigested plant polysaccharides  
173 and proteins exist in large quantities<sup>21</sup>. Together, these observations indicate that the new  
174 MAGs from KIJ samples are associated with the diet-related lifestyles in Japan and Korea.

175

#### 176 **SNV density is positively associated with the speciation rate of gut commensals**

177 We then aligned genomes of species clusters containing  $\geq 3$  genomes with the representative  
178 genome and mapped SNVs (**Methods**). This yielded 274,543,071 SNVs from 2,821 species  
179 clusters, representing 10.07% and 13.34% increases, respectively, from the UHGG. The  
180 Actinobacteriota phylum had the highest SNV density (**Fig. 3a**). Phylogenetically  
181 overdispersed branches of Actinobacteriota species were apparent in both, the HRGM and  
182 UHGG. The majority of genomes from the overdispersed tree region belonged to the  
183 *Collinsella* genus. We divided these genomes into ones from a tree region with a modest  
184 phylogenetic dispersion (MD, 20 genomes) and those with a high phylogenetic dispersion  
185 (HD, 619 genomes) (**Fig. 3b**). Although the majority of genomes were not annotated at the  
186 species level, *Collinsella aerofaciens* was enriched in the HD group and other known  
187 *Collinsella* species were enriched in the MD group (**Fig. 3c**). SNV density in HD group was  
188 significantly higher than that of MD group (**Fig. 3d**).

189 SNV, a within-species genetic variation, is a major mechanism for the adaptation of  
190 commensal species to a distinct host environment. Wide dispersion of species branches  
191 indicates rapid speciation. Accordingly, high SNV density for a species with an overdispersed

192 tree may indicate that the degree of within-species genetic variation may be positively  
193 associated with the speciation rate of gut commensals. To test this, we examined the  
194 correlation between SNV density of representative species and their phylogenetic distance to  
195 the five nearest species. The branch length to the neighboring species in the phylogenetic tree  
196 of a species that arose during rapid speciation tends to be short. We observed an inverse  
197 correlation between the average phylogenetic distance to the five nearest species and their  
198 SNV density (**Fig. 3e**), and a significantly higher SNV density for the top 10% species with  
199 shorter phylogenetic distance to the nearest five species than those for the bottom 90%  
200 species (**Fig. 3f**). This supports the model of a positive correlation of SNV density and the  
201 speciation rate of gut commensals.

202

### 203 **Functional landscape of 103 million proteins from human gut prokaryotes**

204 Information on proteins encoded in the human gut microbes will facilitate the functional  
205 characterization of disease-associated microbiota. Using an in-house computational pipeline  
206 for cataloging human gut prokaryotic proteins (**Supplementary Fig. 1c** and **Supplementary**  
207 **Fig. 7**), we first identified 64,661,728 CDS (coding sequences) from 29,082 genomes from  
208 KIJ samples using Prodigal<sup>22</sup>. To reduce redundancy in the protein catalog, we first executed  
209 CD-HIT<sup>23</sup> at 100% similarity level and then combined with proteins cataloged by the UHGP-  
210 100<sup>11</sup>. The consolidated protein catalog was next consecutively clustered by CD-HIT at lower  
211 sequence similarity levels: 95%, 90%, 70%, and 50%. This led to approximately 103.7, 20.0,  
212 14.8, 8.5, and 4.7 million proteins at the sequence similarity levels of 100%, 95%, 90%, 70%,  
213 and 50%, respectively.

214 Unexpectedly, we observed that the UHGP contains proteins that are 100% identical, even in  
215 a catalog at 50% sequence similarity level. For instance, among the UHGP-50 proteins,  
216 GUT\_GENOME232012\_01109 and GUT\_GENOME231777\_00918 have an identical amino  
217 acid sequence. We identified 8,663, 82,507, 243,362, and 75,620,150 proteins that are  
218 redundant at 100% similarity in the UHGP-50, UHGP-90, UHGP-95, and UHGP-100,  
219 respectively. Exclusion of the UHGP proteins that were 100% identical revealed that the  
220 HRGM contains more proteins than UHGP at all levels of sequence similarity except for 50%  
221 (**Supplementary Table 3**).



222 To facilitate the functional interpretation of gut microbiome profiles, we next annotated  
223 functional genomic elements and proteins in the HRMG. We predicted and annotated non-  
224 coding RNAs and functional peptides, using Prokka<sup>24</sup>; antibiotic resistance genes, using  
225 RGI<sup>25</sup>; biosynthetic gene clusters, using antiSMASH<sup>26</sup>; and 16S rRNA regions, using  
226 barrnap<sup>27</sup>. For functional annotation of proteins, we used eggNOG-mapper<sup>28</sup>. Notably, the  
227 landscape of antibiotic resistance ontology revealed that phylogenetically close species in the  
228 human gut tend to share antibiotic resistance mechanisms (**Supplementary Fig. 8**). A  
229 significantly large portion of the human gut prokaryotic proteins has not yet been functionally  
230 annotated. For the HRGM protein catalogs at 100%, 95%, 90%, 70%, and 50% similarity  
231 levels, 13.13%, 28.05%, 29.17%, 36.35%, and 47.62% of proteins, respectively, had no  
232 functional annotation, according to eggNOG-mapper. This effect appears to be amplified by  
233 redundant proteins, resulting in a reduced annotation rate at low similarity level. Further, the  
234 annotation rate of proteins that are shared by many species is higher than that of species-  
235 specific proteins (**Supplementary Fig. 9**).

236

### 237 **HRGM improves taxonomic and functional classification of sequencing reads**

238 According to a recent benchmark study, whole-DNA-based methods outperform marker-  
239 based methods for taxonomic classification of metagenomic sequencing reads<sup>29</sup>. The  
240 performance of whole-DNA-based methods relies on the quality of the reference genome  
241 database. The standard databases lack numerous genomes of species that exist in the human  
242 gut, which leads to false-negatives, while including many genomes from other microbial  
243 communities, which leads to false-positives<sup>29</sup>. We hypothesized that the HRGM, which is  
244 specific to the human gut microbiome and more comprehensive than other databases, can  
245 improve the taxonomic classification of sequencing reads. We used Kraken2<sup>17</sup> to compare the  
246 taxonomic classification of three genome databases: a standard database that contains  
247 RefSeq<sup>30</sup> complete genomes (RefSeq CG) of bacterial, archaeal, and viral domains; the  
248 UHGG-based database; and the HRGM-based database. To generate independent test  
249 datasets, we compiled WMS data for 1,022 fecal samples from the US, Cameroon,  
250 Luxembourg, and Korea, which were not included in the UHGG nor HRGM. We then  
251 evaluated the efficacy of Kraken2 classification based on the proportion of classified reads  
252 (**Methods**). The classification efficacy using the UHGG and HRGM-based databases was

253 substantially higher than that of the standard database (**Fig. 4a,b**,  $P < 0.001$ , two-sided  
254 Wilcoxon signed-rank test). In addition, the variance of the read classification rate of custom  
255 databases was significantly smaller than that of the standard database, except for the  
256 Cameroon population (**Fig. 4a**,  $P < 0.001$ , Brown-Forsythe test). Importantly, the  
257 classification efficacy of the HRGM-based database was significantly improved compared  
258 with that of the UHGG-based database for the four test samples (**Fig. 4a,c**,  $P < 0.001$ , two-  
259 sided Wilcoxon signed-rank test), which suggests that the updated reference genome database  
260 improves taxonomic classification of the gut metagenomic sequencing data.

261 Next, we investigated the efficacy of functional classification based on the number of aligned  
262 sequencing reads from reference protein databases. Because of the extremely large number of  
263 reference proteins, we used only 40 samples randomly selected from the 1,022 fecal samples  
264 (10 samples from each population), and aligned the sequencing reads with the UHGP-95 and  
265 HRGM-95 protein catalogs (**Methods**). The number of aligned reads was 1.31% higher, on  
266 average, with HRGM-95 in all tested samples than with UHGP-95 (**Fig. 4d**), although  
267 HRGM-95 contains 0.4% more proteins than UHGP-95.

268 Taken together, the newly assembled genomes from under-represented Asian countries  
269 significantly improve the genome and protein databases for metagenomic analysis of both,  
270 taxonomic and functional profiling.

271

## 272 **Reliable taxonomic profiling of low-abundance taxa requires deep sequencing**

273 Taxonomic profiles obtained by shallow sequencing (0.5–2 million reads) highly correlate  
274 with those obtained by ultra-deep sequencing (2.5 billion reads)<sup>31</sup>. However, this evaluation  
275 is based on entire taxa, in which highly abundant or core taxa govern the correlation measure.  
276 Further, low-abundance taxa likely play important, as yet unknown, biological roles in the gut  
277 microbial communities<sup>32,33</sup>. We therefore evaluated the impact of sequencing depth on the  
278 reliability of taxonomic profiling for different ranges of taxon abundance. We generated a  
279 simulated dataset at various sequencing depths 16 new Korean fecal samples, and not  
280 included in the HRGM. We then stratified the taxonomic features into eight different groups,  
281 according to the mean relative abundance (**Fig. 5a,b**). We calculated the mean Pearson  
282 correlation coefficient ( $PCC$ ) and the mean Spearman correlation coefficient ( $SCC$ ) between

283 the taxonomic profiles at different sequencing depths for different mean relative abundances  
284 (**Methods**). The taxonomic profile similarity between two groups showed increasing *PCC*  
285 and *SCC* with an increasing sequencing depth. For example, >10 million read pairs (3 Gbp)  
286 may need to have taxonomic profiles that highly correlate ( $PCC > 0.9$ ) with those based on  
287 80 million read pairs (25 Gbp) to account for the features with lowest 13.92% of relative  
288 abundance (relative abundance  $< 1e-06$ ) (**Fig. 5c and Supplementary Fig. 10a**). For *SCC*  $>$   
289 0.9, the required sequencing depth increased to 20 million read pairs (6 Gbp) for taxonomic  
290 features with a similar level of relative abundance (**Fig. 5b and Supplementary Fig. 10b**).  
291 Overall, these observations suggest that deep sequencing (>20 million read pairs) may be  
292 required to obtain reliable taxonomic profiles of low-abundance taxa.

293

### 294 **Sequencing 30 Gbp is optimal for functional profiling of the human gut microbiome**

295 Next, using the protein catalog, we investigated the optimal sequencing depth for functional  
296 profiling of the human gut microbiome. Since the detection of gene content generally requires  
297 a much deeper sequencing depth than that for the detection of genomes, we analyzed the  
298 WMS data for five Korean fecal samples at a depth of approximately 200 million read pairs  
299 (60 Gbp) (**Methods**). The number of the detected coding genes initially grew rapidly as the  
300 sequencing depth increased, but later approached the estimated maximum count  
301 (**Supplementary Fig. 11a**). The curves fitted well ( $R^2 > 0.99$ ) two-site saturation models<sup>34</sup>,  
302 and we hence estimated the maximum number of coding genes for each sample using the  
303 regression model. Interestingly, the estimated maximum gene counts in the samples differed,  
304 reflecting the different alpha diversity of the microbial community. However, all samples  
305 showed very similar normalized maximum gene count curves, with over 80% of the gut  
306 microbial coding genes detected by sequencing 30 Gbp or 100 million read pairs in all  
307 samples (**Supplementary Fig. 11b**). Sequencing another 30 Gbp would fail to detect 90% of  
308 the maximum gene count. Therefore, 100 million read pairs is the optimal sequencing depth  
309 for the best trade-off between the sequencing cost and the gain-of-functional information for  
310 WMS-based studies of the human gut microbiome.

311

### 312 **Profiling cross-reactivity potential identifies autoimmune-associated commensals**

313 Microbial peptides homologous to the host auto-antigens may stimulate host immune cells  
314 and, hence, the hypothesis of molecular mimicry has emerged as a mechanism underlying  
315 autoimmune diseases<sup>35</sup>. To systematically evaluate this hypothesis, we mapped microbial  
316 peptide sequences homologous to the human self-antigens involved in autoimmune diseases  
317 onto the genomes of HRGM representative species. We first compiled autoimmune disease-  
318 related antigen set from the Immune Epitope Database (IEDB)<sup>36</sup>, and then used it for  
319 homology-searches of microbial peptide sequences from 5,414 representative species. We  
320 thus identified species with a high cross-reactivity potential based on the density of the  
321 encoded cross-reactive epitopes. Because the number of epitope-containing genes (ECG)  
322 increased as the number of coding genes increased (**Fig. 6a**), we divided the ECG count by  
323 the total number of genes for each species. Some human gut commensals had a relatively  
324 high cross-reactivity potential (**Fig. 6b,c, Methods**). On the genus level, *Akkermansia*,  
325 *Alistipes*, *Bifidobacterium*, *Lawsonibacter*, *Oscillibacter*, *Prevotella*, and *Sutterella* have a  
326 high cross-reactivity potential (**Fig. 6d**). Indeed, many of them are associated with  
327 autoimmune diseases. For example, *Akkermansia muciniphila* is abundant in the enthesitis-  
328 related arthritis patients<sup>37</sup>, while *Bifidobacterium* is enriched in these<sup>37</sup> and inflammatory  
329 bowel disease (IBD) patients<sup>38</sup>. Increased abundance of *Oscillibacter* is accompanied by  
330 increased levels of interleukin 6<sup>39</sup>, a pro-inflammatory cytokine that can disrupt the immune  
331 homeostasis and increase the risk of autoimmune diseases. The abundance of intestinal  
332 *Prevotella copri* is strongly correlated with the risk of arthritis<sup>40</sup> and *Sutterella*  
333 *wadsworthensis* is enriched in ulcerative colitis patients who do not respond to fecal  
334 microbiota transplantation<sup>41</sup>. These suggests that cross-reactivity potential of commensal  
335 genomes is predictive for human gut microbiota associated with autoimmune diseases.

336

## 337 **Discussion**

338 In the present study, we constructed an improved catalog of the human reference gut  
339 prokaryotic genomes and their proteins, by including MAGs from fecal metagenomes from  
340 under-represented Asian countries. Inclusion of the newly assembled genomes expanded the  
341 catalog size by over 10%. In addition, we demonstrated that database expansion also  
342 significantly improved the taxonomic and functional classification of sequencing reads. Many  
343 new MAGs were associated with diet-related lifestyles at the sampled geographic locations.

344 Therefore, complementation of metagenome datasets to account for under-sampled  
345 geographical locations and lifestyles might be an effective strategy for improving the human  
346 reference gut microbiome.

347 We also demonstrated that the analysis of microbial DNA and peptide sequences facilitates  
348 the understanding of gut commensal speciation and interactions with the host immunity. The  
349 colonizing commensal microbes adjust to their host environment via genetic changes and  
350 selection, which lead to genetic variation within species. We cataloged the SNVs of  
351 conspecific genomes and found that the SNV density of gut prokaryotic species is inversely  
352 correlated with the phylogenetic distance to their neighboring species. This may suggest that  
353 the degree of within-species genetic variation is positively associated with the speciation rate  
354 of gut commensal microbes. Whether SNV actually enhances the speciation rate should be  
355 addressed in future investigations. Finally, we showed that systematic analysis of microbial  
356 peptide sequences homologous to the host auto-antigens allows the prediction of gut  
357 microbial taxa potentially associated with autoimmune disease via the mechanism of  
358 molecular mimicry. Such analysis is only possible if microbial protein sequences are  
359 available with the corresponding taxonomic information.

360 As the WMS analysis for population-wide human gut microbiome profiling increases in  
361 popularity, the choice of sequencing depth is an important factor to consider in study design.  
362 Here, we demonstrated that deep sequencing (>20 million read pairs) is necessary for reliable  
363 taxonomic profiling of low-abundance commensals. The current knowledge of human gut  
364 microbiome is biased towards core taxa that are usually highly abundant. Low sequencing  
365 depth (e.g., 0.5–2 million read pairs) may be sufficient for the profiling of core taxa, but not  
366 those with low abundance. Deep sequencing may therefore be required for the WMS-based  
367 analysis of human gut microbiome to investigate the function of relatively unexplored low-  
368 abundance species. Accordingly, the current study provides the guidelines for the choice of  
369 sequencing-depth for the analysis of human gut microbiome for different purposes.

370 In conclusion, the HRGM database, which contains information on various biological entities,  
371 from DNA and protein sequences to pan-genomes of species, is a versatile resource for  
372 functional dissection of disease-associated gut microbiota. The data will be available via a  
373 web server ([www.mbiomenet.org/HRGM/](http://www.mbiomenet.org/HRGM/)) and will be periodically updated as new WMS  
374 data for fecal samples become publically available.

375

## 376 **Methods**

### 377 **Sequencing fecal metagenome samples from Korea, India, and Japan**

378 WMS data for fecal samples from India and Japan were obtained from published studies<sup>14,15</sup>.  
379 Fecal WMS data for India were generated for 110 healthy donors in North-Central and  
380 Southern India<sup>14</sup>. Although the sequencing depth was relatively low (1.2 Gbp on average), it  
381 was expected that many novel genomes would be assembled because MAGs from India are  
382 not included in the existing catalogs. By contrast, 805 MAGs from Japan are included in the  
383 UHGG. However, it was expected that the inclusion of the recently published deep-  
384 sequencing WMS data for 645 Japanese fecal samples (6.5 Gbp on average)<sup>15</sup> would greatly  
385 expand the number of MAGs for Japan. In addition, ultra-deep WMS data (31 Gbp on  
386 average) were generated for fecal samples from 90 Koreans recruited by the Severance  
387 Hospital (Seoul, Korea; IRB No 4-2020-0309 and IRB No 4-2017-0788). Written informed  
388 consent was obtained before the study. The UHGG does not contain any MAGs from Korea.

389 The libraries were prepared as described in the TruSeq Nano DNA Library Prep Reference  
390 Guide (Illumina #15041110). Briefly, 100 ng DNA was fragmented using LE220 Focused  
391 ultrasonicator (Covaris, Inc.). Fragmented DNA was end-repaired and approximately 350-bp  
392 fragments were obtained after size selection. After adapter ligation, eight PCR cycles were  
393 performed. Library quantification was performed as described in the Kapa Illumina Library  
394 Quantification Kit (Kapa Biosystems, #KK4854). Next, 150 bp ×2 paired-end sequencing  
395 was performed using Illumina HiSeq4000. In summary, new WMS data for 845 fecal  
396 samples collected from Korea, India, and Japan were obtained. The total read length was 7.2  
397 Tbp. All samples used in the current study are described in **Supplementary Table 2**.

398

### 399 **Metagenome assembly and binning**

400 The adapter sequences were trimmed, and low-quality bases and short reads were removed  
401 from WMS data using Trimmomatic v0.39<sup>42</sup>. Next, the reads were aligned with the human  
402 genome GRCh38.p7 using Bowtie2 v2.3.5<sup>43</sup>, and the aligned reads were then removed. The  
403 majority of quality-controlled reads were assembled as contigs using metaSPAdes<sup>44</sup>, which is

404 a metagenome-specific pipeline of SPAdes v3.13.0. For unknown reasons, and regardless of  
405 sample size, metaSPAdes runtime was excessively long for 107 samples. In those cases,  
406 MEGAHIT v1.2.8<sup>45</sup> was used (**Supplementary Table 2**).

407 Genome bins were generated using the ensemble approach and three binning tools:  
408 MetaBAT2 v2.13<sup>46</sup>, MaxBin2.0 v2.2.6<sup>47</sup>, and CONCOCT v1.1.0<sup>48</sup>. First, the reads from each  
409 sample were first aligned with the assembled contigs from the previous step using Bowtie2,  
410 and the three binning programs were initiated. The minimum size of a contig for binning was  
411 set at 1,000 bp, except for MetaBAT2, which requires at least 1,500 bp. The three binning  
412 predictions were combined for improved binning results using the bin refinement module of  
413 MetaWRAP v1.2.2<sup>12</sup>, which uses CheckM v1.0.18<sup>49</sup> to evaluate the quality of genome bins in  
414 terms of completeness and contamination rate. The minimum completeness was set at 50%,  
415 the maximum contamination at 5%, and the minimum quality score ( $Completeness - 5 \times$   
416  $Contamination$ ) at 50. The same threshold values for CheckM results were applied during the  
417 construction of the UHGG. This resulted in 7,767 genomes from Korean samples, 563  
418 genomes from Indian samples, and 20,752 genomes from Japanese samples (29,082 genomes  
419 in total). The genome bins were divided into two groups: HQ, bins with over 90%  
420 completeness and less than 5% contamination; and MQ, bins with 50–90% completeness and  
421 less than 5% contamination.

422

### 423 **Generation of genomic species clusters**

424 Groups of genomes that corresponded to species were generated using a two-step iterative  
425 procedure. Preliminary clustering was performed using Mash v2.2<sup>50</sup> algorithm. Mash  
426 distances were calculated for all possible pairs of genomes using the “-s 10,000” parameter.  
427 Next, the average-linkage-based hierarchical clustering was performed, at a cutoff of 0.2.  
428 Mash algorithm is sufficiently fast to calculate all-by-all distances for hundreds of thousands  
429 of genomes in a timely manner. However, this compromises the accuracy, especially for low-  
430 coverage genome pairs<sup>51</sup>, which are common in MAGs. Therefore, to improve cluster quality,  
431 ANImf<sup>51</sup> was calculated for every pair of genomes within each initial cluster. To avoid the  
432 over-estimation of ANI by local alignment, a minimum coverage threshold was applied for  
433 each pair. The coverage cutoff of genome A and genome B was determined at  $\min(0.8,$

434 *Completeness of genome A* × *Completeness of genome B*). If the alignment coverage between  
435 two genomes was lower than the cutoff, they were regarded as different genomes. The  
436 genomes were then clustered using the average linkage-based hierarchical clustering at a  
437 cutoff of 0.05 (or 95% identity), which is a widely accepted ANI threshold for species-level  
438 boundary<sup>4,9-11,52</sup>. The genome intactness score ( $S$ )<sup>9,11</sup>,  $S = Completeness - 5 \times$   
439  $Contamination + 0.5 \times \log_{10}(N50)$ , was then calculated. For clusters containing more than  
440 two genomes, a genome with the highest  $S$  was selected as the representative genome for the  
441 cluster. The above two-step procedure was iterated until the clusters ceased to change. Hence,  
442 2,199 species clusters were generated for 29,082 genomes from KIJ samples, with eight  
443 iterations of the aforementioned procedure (**Supplementary Fig. 1a**). Finally, the 2,199  
444 genomes were combined with 4,644 genomes from the UHGG, generating 5,414 species  
445 clusters for the HRGM at the fourth iteration (**Supplementary Fig. 1b**).

446

#### 447 **Non-redundant genome counting**

448 To count the number of non-redundant genomes, the redundant genomes were removed,  
449 similar to what was done for the UHGG pipeline<sup>11</sup>. First, the pairwise genome distance was  
450 calculated using Mash<sup>50</sup> and the entire genomes were clustered using average-linkage-based  
451 hierarchical clustering, with a 0.001 cutoff (Mash ANI 99.9%). To reduce the computation  
452 time, the hierarchical clustering was performed only for the connected components with the  
453 distance of 0.1, because it is highly unlikely that genomes that are not within the distance of  
454 0.1 are clustered together by a distance of 0.001. In the process, 22,761 genomes were  
455 clustered into 8,508 conspecific genome bins. Multiple genomes from the same sample in the  
456 same species bin were counted only once.

457

#### 458 **Taxonomic and functional annotation of representative species genomes**

459 The taxonomic annotation of 5,414 representative species genomes was performed using the  
460 “classify\_wf” function of GTDB-Tk v1.0.2<sup>18</sup>. The reference version was GTDB R04-RS89,  
461 released in June 2019. Genomic features, such as CDS, rRNA, and tRNA, were identified and  
462 annotated in each genome using Prokka v1.14.5<sup>24</sup> with “--kingdom Bacteria” and “--kingdom  
463 Archaea” parameters for the bacterial and archaeal genomes, respectively. With the protein



464 sequences predicted by Prokka, the antibiotic resistance genes were annotated using RGI  
465 v5.1.0<sup>25</sup> with default parameters. The landscape of antibiotic resistance potential of 5,414  
466 species-representative genomes is depicted in **Supplementary Fig. 8**. Finally, the secondary  
467 metabolite gene cluster was annotated using antiSMASH v5.1.2<sup>26</sup>. For the full-featured  
468 annotation, the “--cb-general, --cb-knownclusters, --cb-subclusters, --asf, --pfam2go, --  
469 smcog-trees, --cf-create-clusters” parameters were set.

470 To render the HRGM useful for the 16S rRNA sequencing-based metagenomic analysis, the  
471 16S rRNA regions for 5,414 representative species genomes were predicted using barnap  
472 v0.9<sup>27</sup> tool and the “--evaluate 1e-05” parameter, and “--kingdom bac” and “--kingdom arc”  
473 parameters for bacterial and archaeal genomes, respectively. The 16S rRNA sequences were  
474 thus directly predicted from 1,364 representative species genomes. For the remaining 4,050  
475 representative species, the search for 16S rRNA sequences was expanded to their conspecific  
476 genomes. The barnap analysis was used for the genomes from KIJ samples and pre-  
477 established 16S rRNA region annotations were used for the genomes from the UHGG.  
478 Within the expanded search space, 16S rRNA sequences were identified for 1,178 additional  
479 genomes. Consequently, 16S rRNA sequences were generated for 2,542 species in the  
480 HRGM (**Supplementary Fig. 4**).

481

## 482 **Cataloging SNVs**

483 For the species bins with more than three genomes, SNVs were identified using the codes  
484 provided by the UHGG<sup>11</sup>. Briefly, non-representative genomes were aligned with the  
485 representative genome in the species bin using nucmer 4.0.0beta2<sup>53</sup>. Best bi-directional  
486 alignments were identified using the delta-filter program and “-q -r” options, and SNVs were  
487 annotated using the show-snp program; nucmer, delta-filter, and show-snp are software  
488 packages of MUMmer v3<sup>54</sup>. For each species bin ( $G$ ) whose representative genome is  $r$ , the  
489 number of SNV per kb was calculated as follows:

$$490 \quad SNV \text{ per kb} = \frac{\sum_{g \in (G - \{r\})} \frac{\#SNV_{r,g}}{Aligned\ length_{r,g}/1000}}{n(G) - 1}$$

491  $SNV \text{ per kb}$  was only calculated for 1,521 species bins with  $\geq 10$  genomes to avoid bias. For  
492 the 1,521 genomes, the average phylogenetic distance to the five nearest species was

493 calculated using the IQ-Tree<sup>55</sup>.

494

#### 495 **Cataloging gut prokaryotic proteins and their functional annotation**

496 Overall, 64,661,728 CDS were identified in 29,082 genomes from the KIJ set using Prodigal  
497 v2.6.3<sup>22</sup> and “-c -m -p single” parameters. Since many proteins were derived from conspecific  
498 genomes, the catalog may have included many homologous proteins. To reduce the  
499 redundancy in the protein catalog, CD-HIT v4.8.1<sup>23</sup> was adopted. To reduce CD-HIT running  
500 time, identical proteins were first clustered and then CD-HIT was executed at 100%  
501 similarity level. The cataloged proteins were then combined with those in UHGP-100<sup>11</sup>. The  
502 consolidated protein catalog was subsequently submitted to CD-HIT clustering analysis at  
503 five different sequence similarity levels, 100%, 95%, 90%, 70%, and 50%. For accurate and  
504 efficient clustering, a multi-step iterative clustering method recommended by the CD-HIT  
505 tutorial was adopted. For instance, the CD-HIT-95 protein catalog (a 95% similarity level  
506 protein catalog) was constructed based on CD-HIT-100 proteins, and the CD-HIT-90 protein  
507 catalog was constructed based on CD-HIT-95 proteins. This resulted in approximately 103.7  
508 million, 20.0 million, 14.8 million, 8.5 million, and 4.7 million proteins at the sequence  
509 similarity levels of 100%, 95%, 90%, 70%, and 50%, respectively. The overall pipeline for  
510 protein catalog construction is depicted in **Supplementary Fig. 7**.

511 Representative protein sequences in the five protein catalogs were functionally annotated  
512 using eggNOG-mapper v2.0.1<sup>28</sup>, which is based on the eggNOG protein database v5.0<sup>56</sup>. The  
513 resultant annotations include eggNOG orthologs and functional terms from several databases,  
514 including Gene Ontology (GO)<sup>57</sup> and Kyoto Encyclopedia of Genes and Genomes (KEGG)<sup>58</sup>.  
515 Further, for each protein cluster, taxonomic origins of all member proteins and the lowest  
516 common ancestor of the cluster were tracked and annotated.

517 The numbers of shared species and shared phyla of proteins in the HRGM-50 protein catalogs  
518 were annotated based on the taxonomic annotation of member proteins. The number of  
519 shared species was binned at the bin size of 10, then the annotation rate for each protein bin  
520 was calculated as the number of annotated proteins divided by the number of proteins in the  
521 bin.

522

## 523 **Reconstruction of the phylogenetic tree**

524 For the bacterial and archaeal genomes, 120 and 122 universal marker genes, respectively,  
525 were predicted by the GTDB-Tk<sup>18</sup>. Using the concatenated sequences of marker genes, the  
526 maximum-likelihood tree was generated using IQ-TREE<sup>55</sup>. The phylogenetic tree of bacterial  
527 genomes was visualized using iTOL<sup>59</sup>.

528

## 529 **Kraken2 databases**

530 The Kraken2 v2.0.8-beta<sup>17</sup> custom database for the HRGM representative genomes was  
531 prepared based on the taxonomic annotations in GTDB-TK<sup>18</sup>. When two or more genomes  
532 were annotated to the same taxon, they were discriminated at the succeeding lower rank. For  
533 example, if *genome a* and *genome b* were both annotated to *species\_A*, *genome a* and *genome*  
534 *b* were annotated as *Species\_A;strain\_1* and *Species\_A;strain\_2*, respectively. By doing so,  
535 the user can select a taxonomic rank, thereby measuring species abundances together or  
536 individually.

537 The Kraken2 database for the UHGG<sup>11</sup> was downloaded from UHGG FTP on March 6, 2020.  
538 The Kraken2 standard database was downloaded and constructed using “kraken2-build --  
539 standard” command on July 14, 2020.

540

## 541 **Measuring taxonomic classification rate of sequencing reads**

542 WMS data were compiled for publicly available data for 926, 54, and 26 fecal samples from  
543 the US<sup>16</sup>, Cameroon<sup>60</sup>, and Luxembourg<sup>61,62</sup>, respectively. WMS data for 16 fecal samples  
544 collected from Korea, which were not included in the HRGM, were also used. These 1,022  
545 fecal samples were neither used for the UHGG nor for the HRGM. The data were pre-  
546 processed and taxonomically classified using Kraken2 with standard database, UHGG-based  
547 database, and HRGM-based database. The taxonomic classification rate was then calculated  
548 based on the proportion of aligned sequence reads in a sample with respect to the database.

549

## 550 **Measurement of functional classification rate of sequencing reads**

551 The functional classification rate of sequencing reads was determined based on the number of  
552 aligned reads against the protein catalog. For the analysis, WMS data were randomly selected  
553 for ten fecal samples from the Cameroon, Korea, US, and Luxembourg cohorts (the same  
554 samples were used for the taxonomic classification assessment). After pre-processing, 40  
555 samples were aligned with the UHGP-95 and HRGM-95 protein databases using blastx of  
556 DIAMOND v0.9.35.136<sup>63</sup>. The results were filtered at >80% query coverage (read coverage)  
557 and >95% alignment identity thresholds. A pair of reads was treated as two independent reads.  
558 For multiple alignments of a read, only the best alignments by bit score and e-value were  
559 considered.

560

### 561 **Finding the optimal sequencing depth for gene-level analysis of the gut microbiome**

562 For five Korean fecal samples, WMS data generated at a sequencing depth of >60 Gbp, the  
563 reads were aligned against the HRGM-95 protein database using blastx of DIAMOND<sup>63</sup>.  
564 Alignment results with >80% read coverage and 80% identity were included in further  
565 analysis. For each sample, the number of detected genes with at least one aligned read was  
566 counted by iteratively removing 1000 randomly selected reads. The number of the detected  
567 genes for a given sequencing depth exhibited a saturation curve. The curve fitted well ( $R^2 >$   
568  $0.99$  for all samples) the two-site binding model<sup>34</sup>. The required sequencing depth for a given  
569 gene coverage was determined based on the estimated maximum number of genes according  
570 to the equation.

571

### 572 **Evaluation of the effect of sequencing depth on *de novo* genome assembly**

573 Nine Korean samples with sequencing depth of >52.5 Gbp (**Supplementary Table 2**) were  
574 selected for analysis. Then, 0.5, 2.5, 5, 10, 20, 40, 80, 125, and 175 million read pairs were  
575 randomly sampled from each of these samples. As the average read-pair length was 300 bp,  
576 the sequencing depths of these random samples corresponded to 150 Mbp, 750 Mbp, 1.5 Gbp,  
577 3 Gbp, 6 Gbp, 12 Gbp, 24 Gbp, 37.5 Gbp, and 52.5 Gbp, respectively (**Supplementary Fig.**  
578 **2**). For the 81 simulated samples (9 samples  $\times$  9 depths), *de novo* genome assembly was  
579 performed using the same pipeline as that used for the database construction.

580 Two adjacent sequencing depths (e.g., 125 vs. 175 million read pairs) were compared to

581 evaluate the effect of sequencing depth on the *de novo* genome assembly. Samples with a  
582 greater sequencing depth may yield more MAGs with over 50% completeness, yet with a  
583 lower average quality, than those with a lower sequencing depth because of MAGs that  
584 barely pass the completeness threshold. Therefore, instead of the average quality scores of all  
585 assembled genomes, two genomes assembled at different sequencing depths for the same  
586 species clusters were compared. Mash<sup>50</sup> clustering of genomes from two random samples was  
587 performed for a comparison based on the average-linkage-based hierarchical clustering, at a  
588 threshold of 0.1 (90% identity). Mash clustering was sufficient for clustering conspecific  
589 genomes in the simulated samples. Indeed, no cluster had more than two genomes from the  
590 same sequencing depth. The assembly quality (completeness, contamination, N50, and  
591 genome size) of conspecific genomes at adjacent sequencing depths was then compared.

592

### 593 **Evaluation of the effect of sequencing depth on taxonomic profiling**

594 To avoid overestimation of performance, WMS data for 16 Korean fecal samples that have  
595 not been used for the HRGM construction and generated at a sequencing depth of >24.5 Gbp  
596 were used. From each of the 16 samples, 1, 5, 10, 20, 40, 60, and 80 million read pairs that  
597 corresponded to 300 Mbp, 1.5 Gbp, 3 Gbp, 6 Gbp, 12 Gbp, 18 Gbp and 24 Gbp, respectively,  
598 were randomly sampled. Taxonomic profiling was then conducted using Kraken2 and the  
599 HRGM-based database. Based on the hypothesis that profiling of low-abundance taxa is more  
600 affected by sequencing depth than abundant ones, the taxonomic features were stratified at  
601 eight different levels of relative abundance, ranging from 1e-07 to 1 with every ten-fold  
602 increase (**Fig. 5a,b**). *PCC* and *SCC* between the taxonomic profiles at different sequencing  
603 depths were then calculated for each group of features for different levels of relative  
604 abundance.

605

### 606 **Profiling cross-reactivity potential of the gut prokaryotic genomes**

607 Epitope sequences from autoimmune disease-related self-antigen were compiled from  
608 IEDB<sup>36</sup>. “Epitope: Linear epitope”, “Antigen: Organism: Homo sapiens”, “Host: Homo  
609 sapiens”, and “Disease: Autoimmune Disease” filters from the IEDB web portal were applied.  
610 Epitope sequences that required post-translational modification (e.g., citrullination and

611 deamination) and epitopes shorter than five amino acids were removed. Next, 24,461 unique  
612 epitope sequences were aligned with the protein sequences encoded by 5,414 species  
613 representatives using BLASTP<sup>64</sup>. For meticulous alignment of short peptide sequences, “-  
614 word\_size 4”, “-evaluate 10000”, and “-max\_target\_seqs 100000” options were applied. For  
615 every epitope-to-gene pairwise alignment, the Alignment Score (AS) was calculated, as  
616 follows:

$$617 \quad AS = (\text{match length} - \text{gap length}) / \text{epitope length}$$

618 AS = 1 alignments were used and the number of protein-coding genes of autoimmune disease  
619 epitopes was calculated for every representative species. The number of ECGs was positively  
620 correlated with the number of genes. Therefore, the number of ECGs was normalized to the  
621 number of genes. To identify epitope-enriched taxonomic clades, EGC per gene of each  
622 taxonomic group were compared with the entire 5,414 genomes, and Mann–Whitney P-  
623 values and fold-change were calculated.

624

## 625 **Data availability**

626 Raw metagenomic sequencing data are available from the Sequence Read Archive (accession  
627 number will be released upon publication). By accessing the web server,  
628 [www.mbiomenet.org/HRGM/](http://www.mbiomenet.org/HRGM/), users can browse and download all genomes for 5,414  
629 representative species, their annotations, and metadata, including geographical origin,  
630 taxonomy, genomic content, and genome statistics. The five classes of protein catalogs, 16S  
631 rRNA sequences, and SNVs are also provided with their functional annotation and taxonomic  
632 origin.

633

## 634 **References**

- 635 1 Shreiner, A. B., Kao, J. Y. & Young, V. B. The gut microbiome in health and in  
636 disease. *Curr Opin Gastroenterol* **31**, 69-75, doi:10.1097/MOG.000000000000139  
637 (2015).
- 638 2 Thursby, E. & Juge, N. Introduction to the human gut microbiota. *Biochem J* **474**,  
639 1823-1836, doi:10.1042/BCJ20160510 (2017).
- 640 3 Zou, Y. *et al.* 1,520 reference genomes from cultivated human gut bacteria enable

- 641 functional microbiome analyses. *Nat Biotechnol* **37**, 179-185, doi:10.1038/s41587-  
642 018-0008-8 (2019).
- 643 4 Forster, S. C. *et al.* A human gut bacterial genome and culture collection for improved  
644 metagenomic analyses. *Nat Biotechnol* **37**, 186-192, doi:10.1038/s41587-018-0009-7  
645 (2019).
- 646 5 Poyet, M. *et al.* A library of human gut bacterial isolates paired with longitudinal  
647 multiomics data enables mechanistic microbiome research. *Nat Med* **25**, 1442-1452,  
648 doi:10.1038/s41591-019-0559-3 (2019).
- 649 6 Browne, H. P. *et al.* Culturing of 'unculturable' human microbiota reveals novel taxa  
650 and extensive sporulation. *Nature* **533**, 543-546, doi:10.1038/nature17645 (2016).
- 651 7 Eckburg, P. B. *et al.* Diversity of the human intestinal microbial flora. *Science* **308**,  
652 1635-1638, doi:10.1126/science.1110591 (2005).
- 653 8 Almeida, A. *et al.* A new genomic blueprint of the human gut microbiota. *Nature* **568**,  
654 499-504, doi:10.1038/s41586-019-0965-1 (2019).
- 655 9 Nayfach, S., Shi, Z. J., Seshadri, R., Pollard, K. S. & Kyrpides, N. C. New insights  
656 from uncultivated genomes of the global human gut microbiome. *Nature* **568**, 505-  
657 510, doi:10.1038/s41586-019-1058-x (2019).
- 658 10 Pasolli, E. *et al.* Extensive Unexplored Human Microbiome Diversity Revealed by  
659 Over 150,000 Genomes from Metagenomes Spanning Age, Geography, and Lifestyle.  
660 *Cell* **176**, 649-662 e620, doi:10.1016/j.cell.2019.01.001 (2019).
- 661 11 Almeida, A. *et al.* A unified catalog of 204,938 reference genomes from the human  
662 gut microbiome. *Nat Biotechnol*, doi:10.1038/s41587-020-0603-3 (2020).
- 663 12 Uritskiy, G. V., DiRuggiero, J. & Taylor, J. MetaWRAP-a flexible pipeline for  
664 genome-resolved metagenomic data analysis. *Microbiome* **6**, 158,  
665 doi:10.1186/s40168-018-0541-1 (2018).
- 666 13 Sieber, C. M. K. *et al.* Recovery of genomes from metagenomes via a dereplication,  
667 aggregation and scoring strategy. *Nat Microbiol* **3**, 836-843, doi:10.1038/s41564-018-  
668 0171-1 (2018).
- 669 14 Dhakan, D. B. *et al.* The unique composition of Indian gut microbiome, gene  
670 catalogue, and associated fecal metabolome deciphered using multi-omics approaches.  
671 *Gigascience* **8**, doi:10.1093/gigascience/giz004 (2019).
- 672 15 Yachida, S. *et al.* Metagenomic and metabolomic analyses reveal distinct stage-  
673 specific phenotypes of the gut microbiota in colorectal cancer. *Nat Med* **25**, 968-976,  
674 doi:10.1038/s41591-019-0458-7 (2019).
- 675 16 Lloyd-Price, J. *et al.* Multi-omics of the gut microbial ecosystem in inflammatory  
676 bowel diseases. *Nature* **569**, 655-662, doi:10.1038/s41586-019-1237-9 (2019).

- 677 17 Wood, D. E., Lu, J. & Langmead, B. Improved metagenomic analysis with Kraken 2.  
678 *Genome Biol* **20**, 257, doi:10.1186/s13059-019-1891-0 (2019).
- 679 18 Chaumeil, P. A., Mussig, A. J., Hugenholtz, P. & Parks, D. H. GTDB-Tk: a toolkit to  
680 classify genomes with the Genome Taxonomy Database. *Bioinformatics*,  
681 doi:10.1093/bioinformatics/btz848 (2019).
- 682 19 Thomas, A. M. *et al.* Metagenomic analysis of colorectal cancer datasets identifies  
683 cross-cohort microbial diagnostic signatures and a link with choline degradation. *Nat*  
684 *Med* **25**, 667-678, doi:10.1038/s41591-019-0405-7 (2019).
- 685 20 Ledford, H. A genetic gift for sushi eaters. *Nature*, doi:10.1038/news.2010.169 (2010).
- 686 21 Xu, J. *et al.* Evolution of symbiotic bacteria in the distal human intestine. *PLoS Biol* **5**,  
687 e156, doi:10.1371/journal.pbio.0050156 (2007).
- 688 22 Hyatt, D. *et al.* Prodigal: prokaryotic gene recognition and translation initiation site  
689 identification. *BMC Bioinformatics* **11**, 119, doi:10.1186/1471-2105-11-119 (2010).
- 690 23 Li, W. & Godzik, A. Cd-hit: a fast program for clustering and comparing large sets of  
691 protein or nucleotide sequences. *Bioinformatics* **22**, 1658-1659,  
692 doi:10.1093/bioinformatics/btl158 (2006).
- 693 24 Seemann, T. Prokka: rapid prokaryotic genome annotation. *Bioinformatics* **30**, 2068-  
694 2069, doi:10.1093/bioinformatics/btu153 (2014).
- 695 25 Alcock, B. P. *et al.* CARD 2020: antibiotic resistome surveillance with the  
696 comprehensive antibiotic resistance database. *Nucleic Acids Res* **48**, D517-D525,  
697 doi:10.1093/nar/gkz935 (2020).
- 698 26 Blin, K. *et al.* antiSMASH 5.0: updates to the secondary metabolite genome mining  
699 pipeline. *Nucleic Acids Res* **47**, W81-W87, doi:10.1093/nar/gkz310 (2019).
- 700 27 Seemann, T. barrmap 0.9: rapid ribosomal RNA prediction.
- 701 28 Huerta-Cepas, J. *et al.* Fast Genome-Wide Functional Annotation through Orthology  
702 Assignment by eggNOG-Mapper. *Mol Biol Evol* **34**, 2115-2122,  
703 doi:10.1093/molbev/msx148 (2017).
- 704 29 Ye, S. H., Siddle, K. J., Park, D. J. & Sabeti, P. C. Benchmarking Metagenomics  
705 Tools for Taxonomic Classification. *Cell* **178**, 779-794,  
706 doi:10.1016/j.cell.2019.07.010 (2019).
- 707 30 O'Leary, N. A. *et al.* Reference sequence (RefSeq) database at NCBI: current status,  
708 taxonomic expansion, and functional annotation. *Nucleic Acids Res* **44**, D733-745,  
709 doi:10.1093/nar/gkv1189 (2016).
- 710 31 Hillmann, B. *et al.* Evaluating the Information Content of Shallow Shotgun  
711 Metagenomics. *mSystems* **3**, doi:10.1128/mSystems.00069-18 (2018).



- 712 32 Claussen, J. C. *et al.* Boolean analysis reveals systematic interactions among low-  
713 abundance species in the human gut microbiome. *PLoS Comput Biol* **13**, e1005361,  
714 doi:10.1371/journal.pcbi.1005361 (2017).
- 715 33 Benjamino, J., Lincoln, S., Srivastava, R. & Graf, J. Low-abundant bacteria drive  
716 compositional changes in the gut microbiota after dietary alteration. *Microbiome* **6**, 86,  
717 doi:10.1186/s40168-018-0469-5 (2018).
- 718 34 Wang, Z. X. & Jiang, R. F. A novel two-site binding equation presented in terms of  
719 the total ligand concentration. *FEBS Lett* **392**, 245-249, doi:10.1016/0014-  
720 5793(96)00818-6 (1996).
- 721 35 Zhang, X., Chen, B. D., Zhao, L. D. & Li, H. The Gut Microbiota: Emerging  
722 Evidence in Autoimmune Diseases. *Trends Mol Med* **26**, 862-873,  
723 doi:10.1016/j.molmed.2020.04.001 (2020).
- 724 36 Vita, R. *et al.* The Immune Epitope Database (IEDB): 2018 update. *Nucleic Acids Res*  
725 **47**, D339-D343, doi:10.1093/nar/gky1006 (2019).
- 726 37 Stoll, M. L. *et al.* Altered microbiota associated with abnormal humoral immune  
727 responses to commensal organisms in enthesitis-related arthritis. *Arthritis Res Ther* **16**,  
728 486, doi:10.1186/s13075-014-0486-0 (2014).
- 729 38 Wang, W. *et al.* Increased proportions of Bifidobacterium and the Lactobacillus group  
730 and loss of butyrate-producing bacteria in inflammatory bowel disease. *J Clin*  
731 *Microbiol* **52**, 398-406, doi:10.1128/JCM.01500-13 (2014).
- 732 39 Claesson, M. J. *et al.* Gut microbiota composition correlates with diet and health in  
733 the elderly. *Nature* **488**, 178-184, doi:10.1038/nature11319 (2012).
- 734 40 Scher, J. U. *et al.* Expansion of intestinal *Prevotella copri* correlates with enhanced  
735 susceptibility to arthritis. *Elife* **2**, e01202, doi:10.7554/eLife.01202 (2013).
- 736 41 Paramsothy, S. *et al.* Specific Bacteria and Metabolites Associated With Response to  
737 Fecal Microbiota Transplantation in Patients With Ulcerative Colitis.  
738 *Gastroenterology* **156**, 1440-1454 e1442, doi:10.1053/j.gastro.2018.12.001 (2019).
- 739 42 Bolger, A. M., Lohse, M. & Usadel, B. Trimmomatic: a flexible trimmer for Illumina  
740 sequence data. *Bioinformatics* **30**, 2114-2120, doi:10.1093/bioinformatics/btu170  
741 (2014).
- 742 43 Langmead, B. & Salzberg, S. L. Fast gapped-read alignment with Bowtie 2. *Nat*  
743 *Methods* **9**, 357-359, doi:10.1038/nmeth.1923 (2012).
- 744 44 Nurk, S., Meleshko, D., Korobeynikov, A. & Pevzner, P. A. metaSPAdes: a new  
745 versatile metagenomic assembler. *Genome Res* **27**, 824-834,  
746 doi:10.1101/gr.213959.116 (2017).
- 747 45 Li, D., Liu, C. M., Luo, R., Sadakane, K. & Lam, T. W. MEGAHIT: an ultra-fast

- 748 single-node solution for large and complex metagenomics assembly via succinct de  
749 Bruijn graph. *Bioinformatics* **31**, 1674-1676, doi:10.1093/bioinformatics/btv033  
750 (2015).
- 751 46 Kang, D. D. *et al.* MetaBAT 2: an adaptive binning algorithm for robust and efficient  
752 genome reconstruction from metagenome assemblies. *PeerJ* **7**, e7359,  
753 doi:10.7717/peerj.7359 (2019).
- 754 47 Wu, Y. W., Simmons, B. A. & Singer, S. W. MaxBin 2.0: an automated binning  
755 algorithm to recover genomes from multiple metagenomic datasets. *Bioinformatics* **32**,  
756 605-607, doi:10.1093/bioinformatics/btv638 (2016).
- 757 48 Alneberg, J. *et al.* Binning metagenomic contigs by coverage and composition. *Nat*  
758 *Methods* **11**, 1144-1146, doi:10.1038/nmeth.3103 (2014).
- 759 49 Parks, D. H., Imelfort, M., Skennerton, C. T., Hugenholtz, P. & Tyson, G. W.  
760 CheckM: assessing the quality of microbial genomes recovered from isolates, single  
761 cells, and metagenomes. *Genome Res* **25**, 1043-1055, doi:10.1101/gr.186072.114  
762 (2015).
- 763 50 Ondov, B. D. *et al.* Mash: fast genome and metagenome distance estimation using  
764 MinHash. *Genome Biol* **17**, 132, doi:10.1186/s13059-016-0997-x (2016).
- 765 51 Olm, M. R., Brown, C. T., Brooks, B. & Banfield, J. F. dRep: a tool for fast and  
766 accurate genomic comparisons that enables improved genome recovery from  
767 metagenomes through de-replication. *ISME J* **11**, 2864-2868,  
768 doi:10.1038/ismej.2017.126 (2017).
- 769 52 Jain, C., Rodriguez, R. L., Phillippy, A. M., Konstantinidis, K. T. & Aluru, S. High  
770 throughput ANI analysis of 90K prokaryotic genomes reveals clear species  
771 boundaries. *Nat Commun* **9**, 5114, doi:10.1038/s41467-018-07641-9 (2018).
- 772 53 Marcais, G. *et al.* MUMmer4: A fast and versatile genome alignment system. *PLoS*  
773 *Comput Biol* **14**, e1005944, doi:10.1371/journal.pcbi.1005944 (2018).
- 774 54 Kurtz, S. *et al.* Versatile and open software for comparing large genomes. *Genome*  
775 *Biol* **5**, R12, doi:10.1186/gb-2004-5-2-r12 (2004).
- 776 55 Nguyen, L. T., Schmidt, H. A., von Haeseler, A. & Minh, B. Q. IQ-TREE: a fast and  
777 effective stochastic algorithm for estimating maximum-likelihood phylogenies. *Mol*  
778 *Biol Evol* **32**, 268-274, doi:10.1093/molbev/msu300 (2015).
- 779 56 Huerta-Cepas, J. *et al.* eggNOG 5.0: a hierarchical, functionally and phylogenetically  
780 annotated orthology resource based on 5090 organisms and 2502 viruses. *Nucleic*  
781 *Acids Research* **47**, D309-D314, doi:10.1093/nar/gky1085 (2018).
- 782 57 Ashburner, M. *et al.* Gene ontology: tool for the unification of biology. The Gene  
783 Ontology Consortium. *Nat Genet* **25**, 25-29, doi:10.1038/75556 (2000).

- 784 58 Kanehisa, M., Sato, Y., Kawashima, M., Furumichi, M. & Tanabe, M. KEGG as a  
785 reference resource for gene and protein annotation. *Nucleic Acids Res* **44**, D457-462,  
786 doi:10.1093/nar/gkv1070 (2016).
- 787 59 Letunic, I. & Bork, P. Interactive Tree Of Life (iTOL): an online tool for phylogenetic  
788 tree display and annotation. *Bioinformatics* **23**, 127-128,  
789 doi:10.1093/bioinformatics/btl529 (2007).
- 790 60 Lokmer, A. *et al.* Use of shotgun metagenomics for the identification of protozoa in  
791 the gut microbiota of healthy individuals from worldwide populations with various  
792 industrialization levels. *PLoS One* **14**, e0211139, doi:10.1371/journal.pone.0211139  
793 (2019).
- 794 61 Schmidt, T. S. *et al.* Extensive transmission of microbes along the gastrointestinal  
795 tract. *Elife* **8**, doi:10.7554/eLife.42693 (2019).
- 796 62 Heintz-Buschart, A. *et al.* Integrated multi-omics of the human gut microbiome in a  
797 case study of familial type 1 diabetes. *Nat Microbiol* **2**, 16180,  
798 doi:10.1038/nmicrobiol.2016.180 (2016).
- 799 63 Buchfink, B., Xie, C. & Huson, D. H. Fast and sensitive protein alignment using  
800 DIAMOND. *Nat Methods* **12**, 59-60, doi:10.1038/nmeth.3176 (2015).
- 801 64 Altschul, S. F., Gish, W., Miller, W., Myers, E. W. & Lipman, D. J. Basic local  
802 alignment search tool. *J Mol Biol* **215**, 403-410, doi:10.1016/S0022-2836(05)80360-2  
803 (1990).

804

## 805 **Competing interests**

806 The authors declare no competing interests.

807

## 808 **Author contributions**

809 CYK and IL conceived this study. CYK and ML constructed the catalog and performed  
810 bioinformatics analysis. SY constructed the web server. KK, DY, and HRK organized the  
811 study cohorts and provided the fecal samples. IL supervised the project. CYK, ML, and IL  
812 wrote the manuscript.

813

## 814 **Acknowledgments**

815 This research was supported by the National Research Foundation funded by the Ministry of  
816 Science and ICT (2018R1A5A2025079, 2018M3C9A5064709, 2019M3A9B6065192) to IL.  
817 We appreciate the assistance from the KOBIC Research Support Program.

818

## 819 **Figure legends**

820 **Fig. 1 | Effect of sequencing depth on *de novo* genome assembly.** **a**, Sequencing depth of  
821 samples from Korea, Japan, and India. Red data points, nine samples used for the generation  
822 of simulated samples for different sequencing depths. **b**, Total read length of samples from  
823 Korea, Japan, and India. **c**, The average number of HQ and MQ genomes (left axis) and the  
824 proportion of HQ genomes (right axis) from nine samples. **d,e**, Completeness (d) and N50 (e)  
825 of assembled genomes from lower sequencing depth (left box of each column) and greater  
826 sequencing depth (right box of each column). **f**, The number of the assembled genomes from  
827 Korea, Japan, and India. **g**, Total number of the assembled genomes from Korea, Japan, and  
828 India, and genome assembly yields. **h**, The relative abundance of 224 Korea-specific, 338  
829 Japan-specific, and 18 India-specific assembled genomes in independent fecal samples from  
830 the US (n = 926). *P*-values were calculated by two-sided Mann–Whitney U test (\*\*:  $P < 0.01$ ;  
831 \*\*\*:  $P < 0.001$ ).

832 **Fig. 2 | Phylogenetic tree of 5,386 representative genomes of prokaryotic species from**  
833 **the human gut contained in the HRGM.** Maximum-likelihood phylogenetic tree  
834 reconstructed from 120 bacterial marker genes (**Methods**). Representative genomes were  
835 annotated by their isolated genome availability (1st layer from the inside), phylum  
836 classification (2nd layer), whether they were from UHGG or assembled from KIJ samples  
837 (3rd layer), 16S rRNA sequence availability (4th layer), and genome completeness (the  
838 outermost layer). Red branches represent 410 genomes from the *Bacteroidaceae* family that  
839 are enriched in the representative genome set updated by including KIJ samples.

840 **Fig. 3 | SNV density analysis of the relationship between within-species variation and**  
841 **speciation of gut microbes.** **a**, The number of SNVs per kb pair of the aligned region. SNV  
842 density is summarized for each phylum. Boxes are sorted by the median. Arc, archaeal  
843 phylum. **b**, The phylogenetic tree for Actinobacteriota phylum. Inside annotation indicates  
844 the *Collinsella* genus, divided into *Collinsella* with modest phylogenetic dispersion (MD

845 *Collinsella*, Red) and *Collinsella* with high phylogenetic dispersion (HD *Collinsella*, Orange).  
846 Black annotations in the outer circle represent *Collinsella aerofaciens*, *Collinsella*  
847 *aerofaciens\_A*, *Collinsella aerofaciens\_E*, and *Collinsella aerofaciens\_F*, according to the  
848 GTDB-TK annotation. **c**, GTDB-TK based taxonomic annotation of MD *Collinsella* and HD  
849 *Collinsella*. **d**, SNV density of HD *Collinsella*, MD *Collinsella*, Non-*collinsella*  
850 actinobacteriota, and other species. **e**, Scatter plot analysis of SNV density and average  
851 phylogenetic distance to the five nearest species of each representative species. Orange points  
852 denote species of HD *Collinsella* and black points represent other species. **f**, Comparison of  
853 SNV density between the top 10% and bottom 90% species sorted from the lowest average  
854 phylogenetic distance to the five nearest species. Statistical significance was calculated by  
855 two-sided Mann–Whitney U test (n.s.: not significant; \*:  $P < 0.05$ ; \*\*\*:  $P < 0.001$ ).

856 **Fig. 4 | Effect of HRGM on taxonomic and functional classification of sequencing reads.**

857 **a**, Proportion of taxonomically classified sequencing reads of WMS data from four different  
858 populations. The significance of the improvement was calculated by Wilcoxon signed-rank  
859 test. Brown–Forsythe test was used to evaluate the decrease of variance. **b,c**, Percent  
860 improvement of the read classification proportion in HRGM-based database compared with  
861 the standard database (b) and the UHGG-based database (c). **d**, The number of reads aligned  
862 to the UHGP-95 and HRGM-95 protein catalogs. Statistical significance was calculated by  
863 using Wilcoxon signed-rank test.

864 **Fig. 5 | Effect of sequencing depth on the reliability of taxonomic profiles.** **a**, The  
865 distribution of taxonomic features over different mean relative abundances. **b**, The  
866 cumulative proportion of taxonomic features at different thresholds of mean relative  
867 abundance. **c,d**, Pearson correlation coefficient (*PCC*) (c) and Spearman correlation  
868 coefficient (*SCC*) (d) of the taxonomic profiles at the given sequencing depth and 80M  
869 fragments. The x-axis (the mean relative abundance threshold) indicates the upper boundary  
870 of the mean relative abundance.

871 **Fig. 6 | Landscape of cross-reactivity potential of gut prokaryotic genomes.** **a**, The  
872 number of genes and autoimmune epitope sequence-containing genes (ECG) in 5,414  
873 genomes of species representatives. Red and orange points, species with the top 1% and 5%  
874 ECG per gene, respectively. **b**, Volcano plot of the enrichment of ECG density. Taxonomic  
875 clades with positive log<sub>2</sub> fold-change and  $P < 1e-5$  are highlighted with different colors.

876 Taxonomic clades denoted by the same color have an inclusive relationship (e.g.,  
877 *g\_Prevotella* belongs to *f\_Bacteroidaceae*), with the exception of p\_Bacteroidota,  
878 c\_Bacteroidia, and o\_Bacteroidales. The first character of each clade name indicates the  
879 taxonomic levels (p: phylum; c: class; o: order; f: family; and g: genus). **c**, The red-  
880 highlighted area from (b). **d**, Maximum-likelihood phylogenetic tree with taxonomic  
881 annotations of clades with high ECG density. The first layer represents clades with the top 1%  
882 (red) and 5% (orange) ECG density [annotations and color designations are the same as in  
883 (a)]. The second and third layers represent enriched taxonomic clades in the volcano plot  
884 [taxonomic annotations and color designations are the same as in (b) and (c)]. The second  
885 layer represents above-genus level annotations. The third layer represents genus-level  
886 taxonomic clades.

887

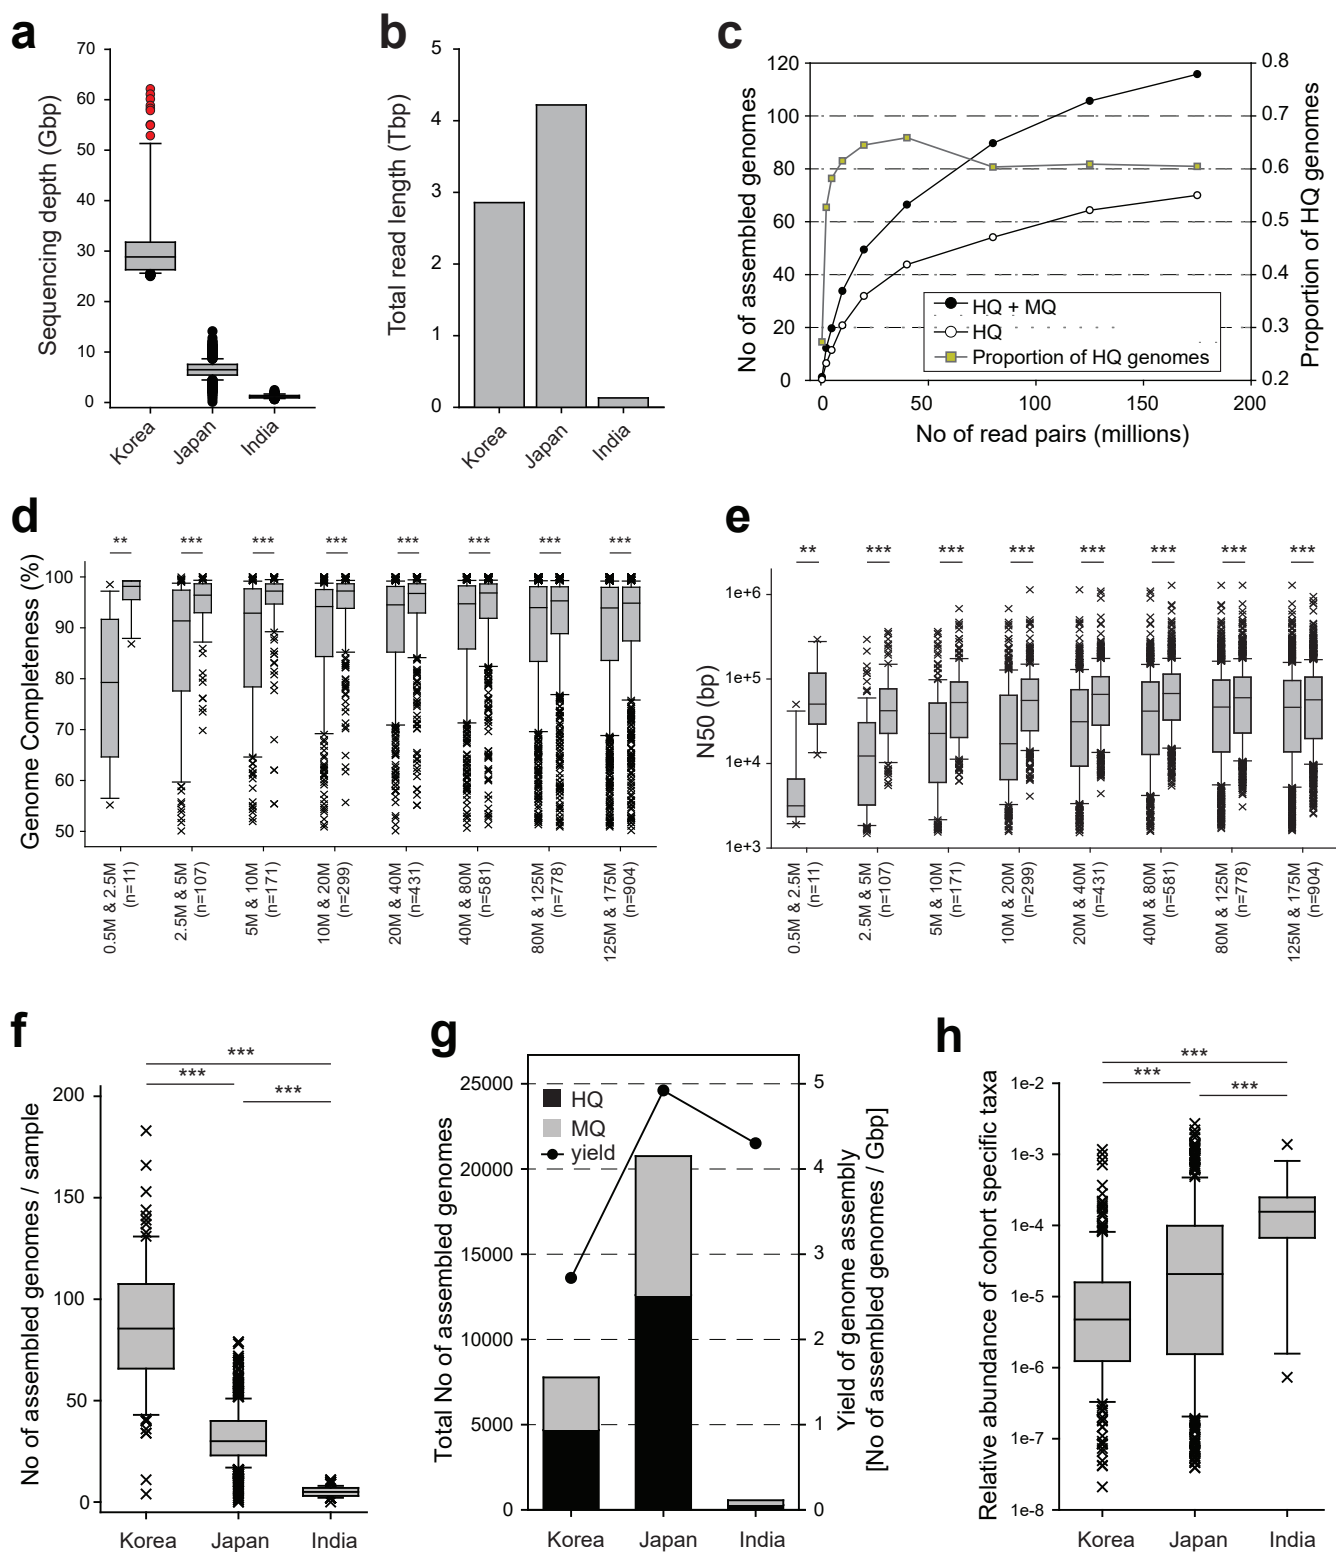

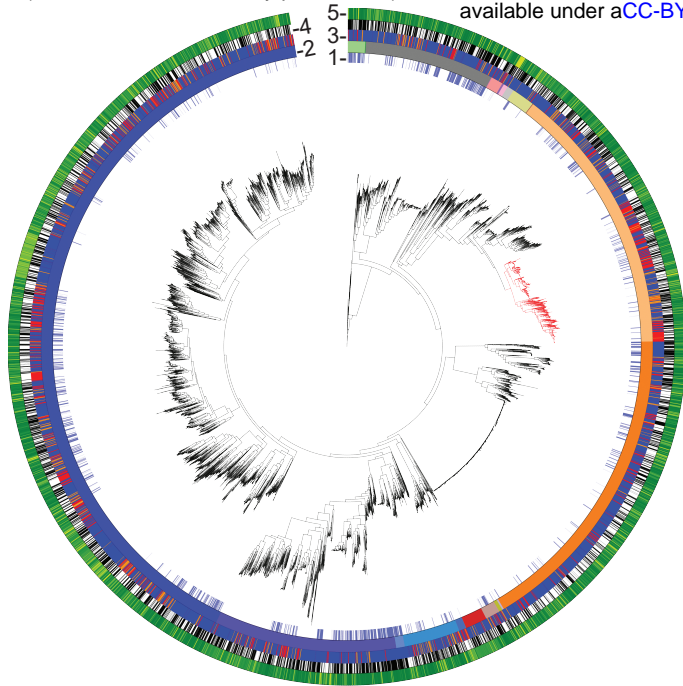

- 1. Isolated genomes availability**
- Isolated genomes available (n=893, 16.5%)
  - No isolated genome available (only MAGs) (n=4,521, 83.5%)
- 2. Phylum classification**
- |                      |                  |                     |
|----------------------|------------------|---------------------|
| ● Actinobacteriota   | ● Fibrobacterota | ● Fusobacteriota    |
| ● Bacteroidota       | ● Firmicutes     | ● Myxococcota       |
| ● Bdellovibrionota   | ● Firmicutes_A   | ● Patescibacteria   |
| ● Campylobacterota   | ● Firmicutes_B   | ● Proteobacteria    |
| ● Cyanobacteria      | ● Firmicutes_C   | ● Spirochaetota     |
| ● Desulfobacterota_A | ● Firmicutes_G   | ● Synergistota      |
| ● Elusimicrobiota    | ● Firmicutes_I   | ● Verrucomicrobiota |
| ● Eremiobacterota    |                  |                     |

- 3. Genomes from UHGG or assembled from KIJ samples?**
- Assembled from KIJ samples only (n=780, 14.4%)
  - From UHGG & assembled from KIJ samples (n=580, 10.7%)
  - From UHGG only (n=4,054, 74.9%)

- 4. 16S rRNA sequence availability**
- 16S rRNA sequence available (n=2,542, 47.0%)
  - No 16S rRNA sequence available (n=2,872, 53.0%)

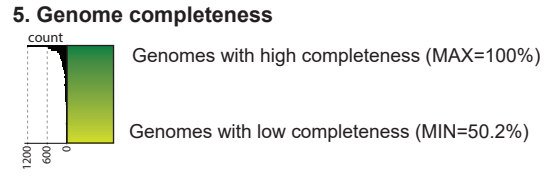



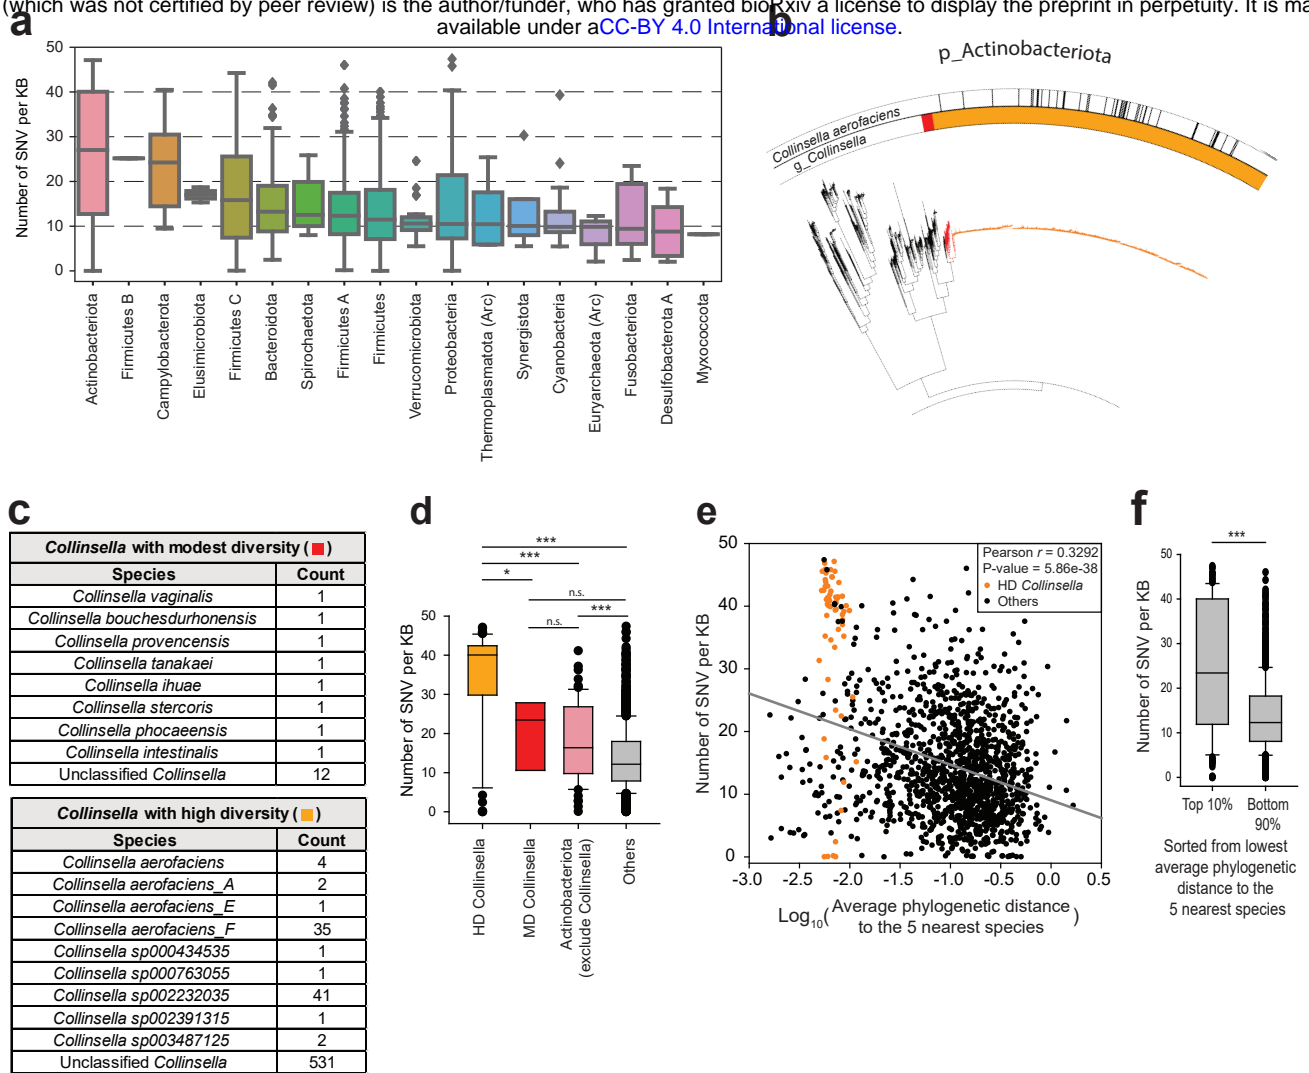

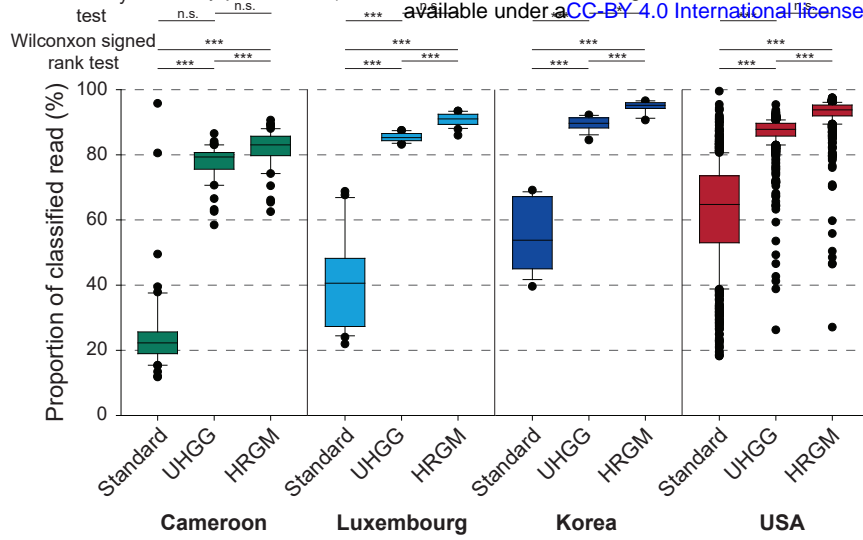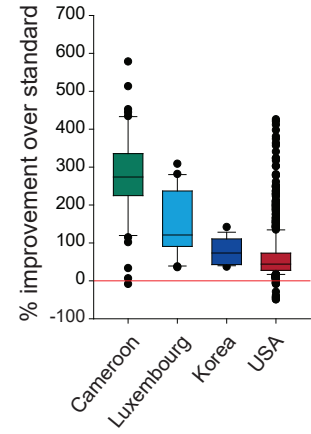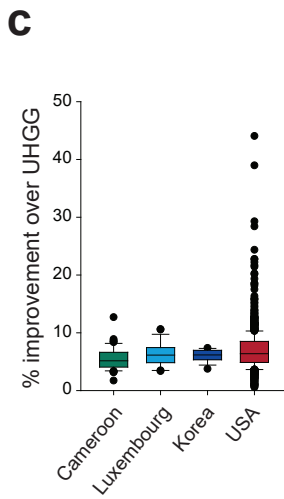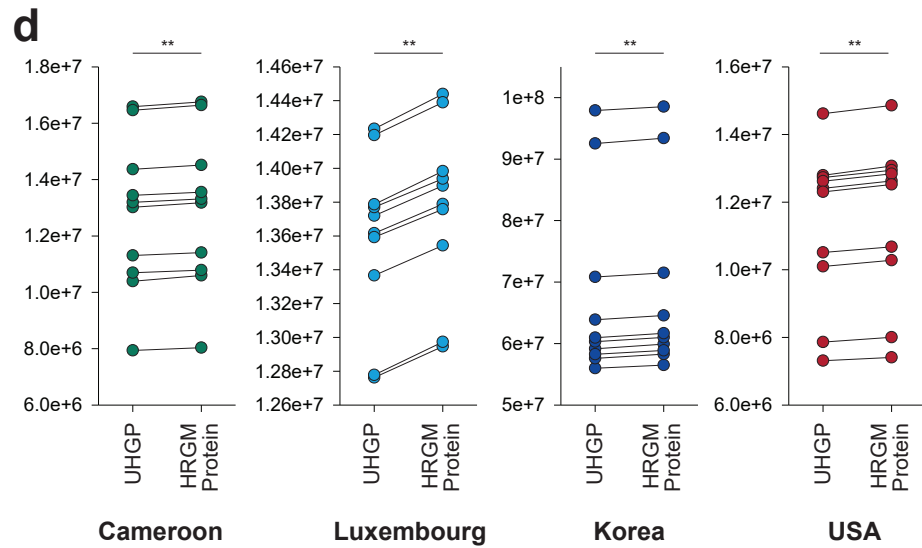

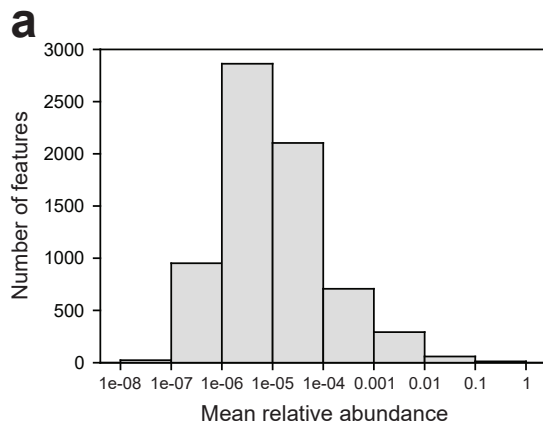

**b**

| Threshold | Feature count | Percentile |
|-----------|---------------|------------|
| < 1e-07   | 24            | 0.34%      |
| < 1e-06   | 976           | 13.92%     |
| < 1e-05   | 3838          | 54.72%     |
| < 1e-04   | 5942          | 84.72%     |
| < 1e-03   | 6649          | 94.80%     |
| < 1e-02   | 6942          | 98.99%     |
| < 1e-01   | 7001          | 99.83%     |
| < 1       | All = 7013    | 100%       |

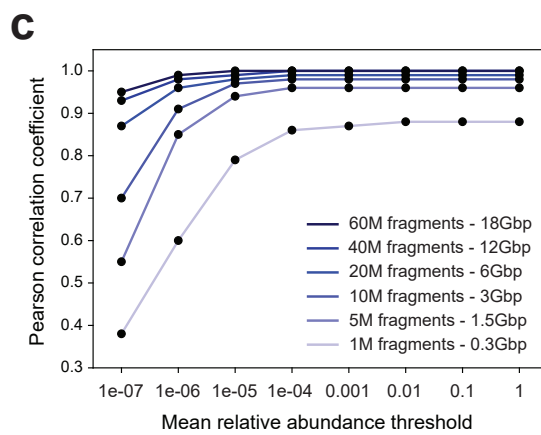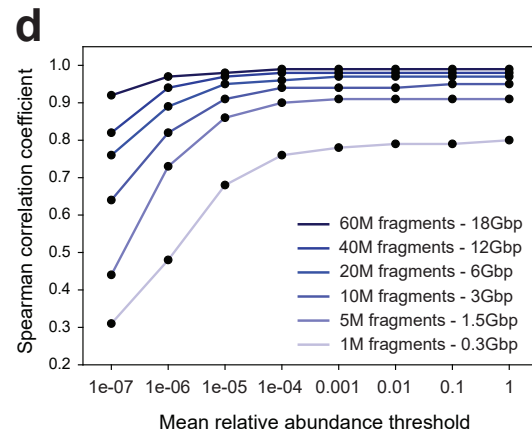

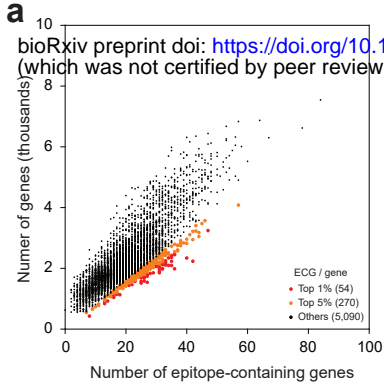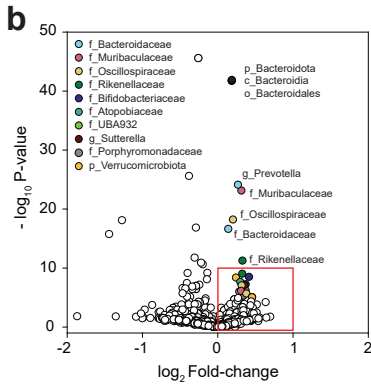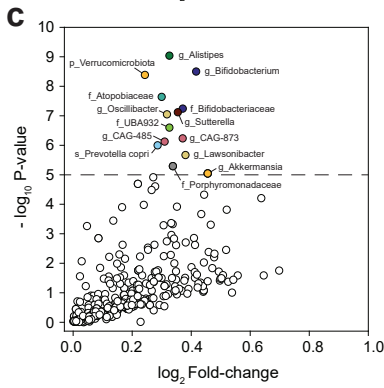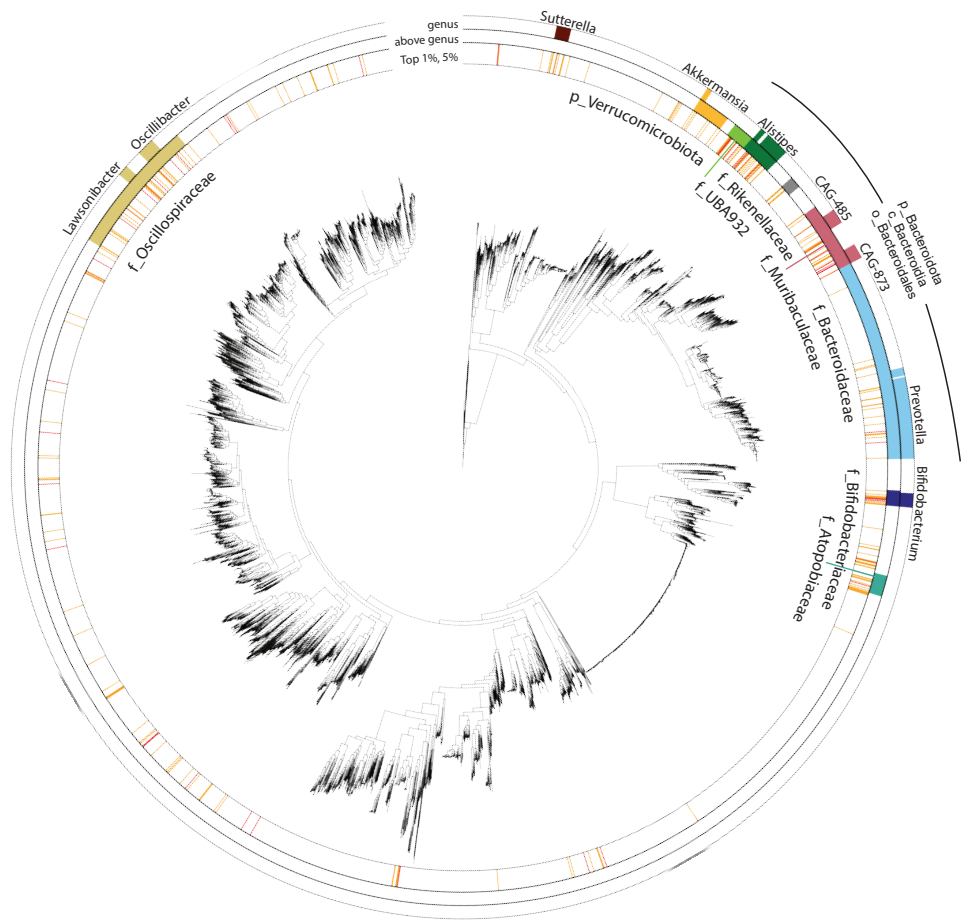

Source: https://www.biorxiv.org/content/biorxiv/early/2020/11/10/2020.11.09.375873.full.pdf
